# Supplementary material for: The Effect of Foliar Putrescine Application, Ammonium Exposure, and Heat Stress on Antioxidant Compounds in Cauliflower Waste
Source: MDPI journal article supplement (doi:10.3390/antiox10050707), 2021-04-29
Supplement: s1 [file s1]

**Supplemental Table 1. p-Value of statistical analysis of figure 2.**

| <b><u>Main effects</u></b>                                            | <b>Total phenolic compounds</b> |              | <b>Antioxidant activity</b> |              |
|-----------------------------------------------------------------------|---------------------------------|--------------|-----------------------------|--------------|
|                                                                       | Outer leaves                    | Young leaves | Outer leaves                | Young leaves |
| T                                                                     | 0.000                           | 0.000        | 0.000                       | 0.000        |
| Put                                                                   | 0.000                           | 0.000        | 0.000                       | 0.000        |
| NO <sub>3</sub> <sup>-</sup> / NH <sub>4</sub> <sup>+</sup>           | 0.000                           | 0.000        | 0.000                       | 0.000        |
| T X Put                                                               | 0.590                           | 0.703        | 0.000                       | 0.051        |
| T X NO <sub>3</sub> <sup>-</sup> / NH <sub>4</sub> <sup>+</sup>       | 0.000                           | 0.003        | 0.000                       | 0.055        |
| Put X NO <sub>3</sub> <sup>-</sup> / NH <sub>4</sub> <sup>+</sup>     | 0.000                           | 0.000        | 0.000                       | 0.000        |
| T X Put X NO <sub>3</sub> <sup>-</sup> / NH <sub>4</sub> <sup>+</sup> | 0.000                           | 0.000        | 0.000                       | 0.000        |

**Supplemental Table 2. p-Value of statistical analysis of Table 2. Effect of the foliar application of putrescine on the concentrations of sugars (g kg<sup>-1</sup> DW) in outer leaves of the cauliflower cv. Moonshine at different NO<sub>3</sub><sup>-</sup>/NH<sub>4</sub><sup>+</sup> ratios and temperatures.**

| <b>Temperature</b>                                                             | <b>NO<sub>3</sub><sup>-</sup>/NH<sub>4</sub><sup>+</sup></b> | <b>Inositol</b> | <b>Glucose</b> | <b>Fructose</b> | <b>Sucrose</b> | <b>Total free sugars</b> |
|--------------------------------------------------------------------------------|--------------------------------------------------------------|-----------------|----------------|-----------------|----------------|--------------------------|
| <b>Main effects</b>                                                            |                                                              |                 |                |                 |                |                          |
| Temperature (T)                                                                |                                                              | 0.000           | 0.000          | 0.000           | 0.000          | 0.000                    |
| Putrescine (Put)                                                               |                                                              | 0.000           | 0.000          | 0.000           | 0.000          | 0.007                    |
| Nitrate/ammonium (NO <sub>3</sub> <sup>-</sup> /NH <sub>4</sub> <sup>+</sup> ) |                                                              | 0.000           | 0.000          | 0.000           | 0.000          | 0.000                    |
| T X Put                                                                        |                                                              | 0.063           | 0.000          | 0.653           | 0.185          | 0.028                    |
| T X NO <sub>3</sub> <sup>-</sup> /NH <sub>4</sub> <sup>+</sup>                 |                                                              | 0.867           | 0.000          | 0.127           | 0.003          | 0.000                    |
| Put X NO <sub>3</sub> <sup>-</sup> /NH <sub>4</sub> <sup>+</sup>               |                                                              | 0.000           | 0.000          | 0.000           | 0.000          | 0.255                    |
| T X Put X NO <sub>3</sub> <sup>-</sup> /NH <sub>4</sub> <sup>+</sup>           |                                                              | 0.18            | 0.000          | 0.010           | 0.000          | 0.021                    |

| Supplemental Table 2 continued. p-Value of statistical analysis of Table 2 continued. |                                               |          |         |          |         |                   |
|---------------------------------------------------------------------------------------|-----------------------------------------------|----------|---------|----------|---------|-------------------|
| Temperature                                                                           | NO <sub>3</sub> /NH <sub>4</sub> <sup>+</sup> | Inositol | Glucose | Fructose | Sucrose | Total free sugars |
| Main effects                                                                          |                                               |          |         |          |         |                   |
| Temperature (T)                                                                       |                                               | 0.000    | 0.000   | 0.000    | 0.000   | 0.000             |
| Putrescine (Put)                                                                      |                                               | 0.000    | 0.008   | 0.002    | 0.000   | 0.002             |
| Nitrate/ammonium (NO <sub>3</sub> <sup>-</sup><br>/NH <sub>4</sub> <sup>+</sup> )     |                                               | 0.000    | 0.000   | 0.000    | 0.000   | 0.000             |
| T X Put                                                                               |                                               | 0.886    | 0.664   | 0.953    | 0.244   | 0.926             |
| T X NO <sub>3</sub> <sup>-</sup> /NH <sub>4</sub> <sup>+</sup>                        |                                               | 0.424    | 0.593   | 0.593    | 0.026   | 0.609             |
| Put X NO <sub>3</sub> <sup>-</sup> /NH <sub>4</sub> <sup>+</sup>                      |                                               | 0.000    | 0.000   | 0.000    | 0.000   | 0.000             |
| T X Put X NO <sub>3</sub> <sup>-</sup> /NH <sub>4</sub> <sup>+</sup>                  |                                               | 0.108    | 0.048   | 0.824    | 0.254   | 0.241             |

| Supplemental Table 3. p-Value of statistical analysis of Table 3.              |                                                            |            |            |            |          |       |
|--------------------------------------------------------------------------------|------------------------------------------------------------|------------|------------|------------|----------|-------|
| Temperature                                                                    | NO <sub>3</sub> <sup>-</sup> /NH <sub>4</sub> <sup>+</sup> | Putrescine | Cadaverine | Spermidine | Spermine | Total |
| Main effects                                                                   |                                                            |            |            |            |          |       |
| Temperature (T)                                                                |                                                            | 0.000      | 0.000      | 0.000      | 0.000    | 0.000 |
| Putrescine (Put)                                                               |                                                            | 0.000      | 0.000      | 0.000      | 0.019    | 0.000 |
| Nitrate/ammonium (NO <sub>3</sub> <sup>-</sup> /NH <sub>4</sub> <sup>+</sup> ) |                                                            | 0.000      | 0.000      | 0.000      | 0.137    | 0.000 |
| T X Put                                                                        |                                                            | 0.000      | 0.000      | 0.042      | 0.732s   | 0.000 |
| T X NO <sub>3</sub> <sup>-</sup> /NH <sub>4</sub> <sup>+</sup>                 |                                                            | 0.000      | 0.002      | 0.002      | 0.201    | 0.000 |
| Put X NO <sub>3</sub> <sup>-</sup> /NH <sub>4</sub> <sup>+</sup>               |                                                            | 0.000      | 0.000      | 0.000      | 0.174    | 0.000 |
| T X Put X NO <sub>3</sub> <sup>-</sup> /NH <sub>4</sub> <sup>+</sup>           |                                                            | 0.000      | 0.000      | 0.000      | 0.000    | 0.000 |

| Supplemental Table 3 continued. p-Value of statistical analysis of Table 3 continued. |                                                            |            |            |            |          |       |
|---------------------------------------------------------------------------------------|------------------------------------------------------------|------------|------------|------------|----------|-------|
| Temperature                                                                           | NO <sub>3</sub> <sup>-</sup> /NH <sub>4</sub> <sup>+</sup> | Putrescine | Cadaverine | Spermidine | Spermine | Total |
| Main effects                                                                          |                                                            |            |            |            |          |       |
| Temperature (T)                                                                       |                                                            | 0.000      | 0.000      | 0.000      | 0.000    | 0.000 |
| Putrescine (Put)                                                                      |                                                            | 0.000      | 0.111      | 0.000      | 0.013    | 0.000 |
| Nitrate/ ammonium (NO <sub>3</sub> <sup>-</sup> /NH <sub>4</sub> <sup>+</sup> )       |                                                            | 0.000      | 0.072      | 0.000      | 0.000    | 0.000 |
| T X Put                                                                               |                                                            | 0.205      | 0.403      | 0.465      | 0.445    | 0.506 |
| T X NO <sub>3</sub> <sup>-</sup> /NH <sub>4</sub> <sup>+</sup>                        |                                                            | 0.142      | 0.309      | 0.234      | 0.742    | 0.243 |
| Put X NO <sub>3</sub> <sup>-</sup> /NH <sub>4</sub> <sup>+</sup>                      |                                                            | 0.000      | 0.062      | 0.000      | 0.000    | 0.000 |
| T X Put X NO <sub>3</sub> <sup>-</sup> /NH <sub>4</sub> <sup>+</sup>                  |                                                            | 0.000      | 0.412      | 0.442      | 0.442    | 0.515 |
